# Supplementary material for: Excitation wavelength-reliant light-induced energy and electron processes in pyrene and naphthalene functionalized dual-dye integrated polyaromatic azaborondipyrromethenes
Source: Royal Society of Chemistry journal article supplement (doi:10.1039/d3nj03973k), 2023-01-01
Supplement: d3nj03973k1.pdf [file d3nj03973k1.pdf]

## Supporting Information

### **Excitation Wavelength Reliant Light Induced Energy and Electron Processes in Pyrene and Naphthalene Functionalized Dual-Dye Integrated Polyaromatic Azaborondipyrromethenes**

**Boligorla Anjaiah,<sup>a</sup> Manne Naga Rajesh,<sup>b,c</sup> Lingamallu Giribabu,<sup>\*b,c</sup> Raghu Chitta<sup>\*a</sup>**

*<sup>a</sup>Artificial Photosynthesis Laboratory, Department of Chemistry, National Institute of Technology Warangal, Hanamkonda – 506004, Telangana, India.*

*<sup>b</sup>Polymers & Functional Materials Division, CSIR-Indian Institute of Chemical Technology, Tarnaka, Hyderabad-500007, Telangana, India.*

*<sup>c</sup>Academy of Scientific and Innovative Research, Ghaziabad, 201002, India.*

| Sl. No.  | Table of Contents                                                                                                                                                                                                                                                           | Page No. |
|----------|-----------------------------------------------------------------------------------------------------------------------------------------------------------------------------------------------------------------------------------------------------------------------------|----------|
| Fig. S1  | <sup>1</sup> H NMR spectrum of ( <i>E</i> )-1-(naphthalen-1-yl)-3-(pyren-1-yl)prop-2-en-1-one ( <b>1a</b> ) in CDCl <sub>3</sub> .                                                                                                                                          | S4       |
| Fig. S2  | ESI-MS spectrum of ( <i>E</i> )-1-(naphthalen-1-yl)-3-(pyren-1-yl)prop-2-en-1-one ( <b>1a</b> ) in methanol.                                                                                                                                                                | S4       |
| Fig. S3  | <sup>1</sup> H NMR spectrum of ( <i>E</i> )-1-phenyl-3-(pyren-1-yl)prop-2-en-1-one ( <b>2a</b> ) in CDCl <sub>3</sub> .                                                                                                                                                     | S5       |
| Fig. S4  | ESI-MS of ( <i>E</i> )-1-phenyl-3-(pyren-1-yl)prop-2-en-1-one ( <b>2a</b> ) in methanol.                                                                                                                                                                                    | S5       |
| Fig. S5  | <sup>1</sup> H NMR spectrum of 1-(Naphthalen-1-yl)-4-nitro-3-(pyren-1-yl)butan-1-one ( <b>1b</b> ) in CDCl <sub>3</sub> .                                                                                                                                                   | S6       |
| Fig. S6  | ESI-MS of 1-(Naphthalen-1-yl)-4-nitro-3-(pyren-1-yl)butan-1-one ( <b>1b</b> ) in methanol.                                                                                                                                                                                  | S6       |
| Fig. S7  | <sup>1</sup> H NMR spectrum of 4-Nitro-1-phenyl-3-(pyren-1-yl)butan-1-one ( <b>2b</b> ) in CDCl <sub>3</sub> .                                                                                                                                                              | S7       |
| Fig. S8  | ESI-MS of 4-Nitro-1-phenyl-3-(pyren-1-yl)butan-1-one ( <b>2b</b> ) in methanol.                                                                                                                                                                                             | S7       |
| Fig. S9  | <sup>1</sup> H NMR spectrum of ( <i>Z</i> )-5-(naphthalen-1-yl)-N-(5-(naphthalen-1-yl)-3-(pyren-1-yl)-1H-pyrrol-2-yl)-3-(pyren-1-yl)-2H-pyrrol-2-imine ( <b>1c</b> ) in CDCl <sub>3</sub> .                                                                                 | S8       |
| Fig. S10 | ESI-MS spectrum of ( <i>Z</i> )-5-(naphthalen-1-yl)-N-(5-(naphthalen-1-yl)-3-(pyren-1-yl)-1H-pyrrol-2-yl)-3-(pyren-1-yl)-2H-pyrrol-2-imin ( <b>1c</b> ) in methanol.                                                                                                        | S8       |
| Fig. S11 | <sup>1</sup> H NMR spectrum of ( <i>Z</i> )-5-phenyl-N-(5-phenyl-3-(pyren-1-yl)-1H-pyrrol-2-yl)-3-(pyren-1-yl)-2H-pyrrol-2-imine ( <b>2c</b> ) in CDCl <sub>3</sub> .                                                                                                       | S9       |
| Fig. S12 | ESI-MS spectrum of ( <i>Z</i> )-5-phenyl-N-(5-phenyl-3-(pyren-1-yl)-1H-pyrrol-2-yl)-3-(pyren-1-yl)-2H-pyrrol-2-imine ( <b>2c</b> ) in methanol.                                                                                                                             | S9       |
| Fig. S13 | <sup>1</sup> H NMR spectrum of 4,4-Difluoro-1,7-di-(pyren-1-yl)-3,5-di(1-naphthyl)-4-bora-3a, 4a, 8-triaza-s-indacene ( <b>1</b> ) in CDCl <sub>3</sub> .                                                                                                                   | S10      |
| Fig. S14 | ESI-MS of 4,4-Difluoro-1,7-di (pyren-1-yl)-3,5-di-(1-naphthyl)-4-bora-3a, 4a, 8-triaza-s-indacene ( <b>1</b> ) in methanol.                                                                                                                                                 | S10      |
| Fig. S15 | <sup>1</sup> H NMR spectrum of 4,4-Difluoro-1,7-di-(pyren-1-yl)-3,5-di(phenyl)-4-bora-3a, 4a, 8-triaza-s-indacene ( <b>2</b> ) in CDCl <sub>3</sub> .                                                                                                                       | S11      |
| Fig. S16 | ESI-MS of 4,4-Difluoro-1,7-di-(pyren-1-yl)-3,5-di(phenyl)-4-bora-3a, 4a, 8-triaza-s-indacene ( <b>2</b> ) in methanol.                                                                                                                                                      | S11      |
| Fig. S17 | <sup>11</sup> B NMR spectrum of 4,4-Difluoro-1,7-di (pyren-1yl)-3,5-di(1-naphthyl)-4-bora-3a, 4a, 8-triaza-s-indacene ( <b>1</b> ) in CDCl <sub>3</sub> .                                                                                                                   | S12      |
| Fig. S18 | <sup>19</sup> F spectrum of 4,4-Difluoro-1,7-di (pyren-1yl)-3,5-di(1-naphthyl)-4-bora-3a, 4a, 8-triaza-s-indacene ( <b>1</b> ) in CDCl <sub>3</sub> .                                                                                                                       | S12      |
| Fig. S19 | <sup>19</sup> F NMR spectrum of 4,4-Difluoro-1,7-di-(pyren-1-yl)-3,5-di(phenyl)-4-bora-3a, 4a, 8-triaza-s-indacene ( <b>2</b> ) in CDCl <sub>3</sub> .                                                                                                                      | S13      |
| Fig. S20 | Cyclic voltammetry of <b>1</b> , <b>2</b> , <b>3</b> , and <b>TABPY</b> in dichloromethane containing 0.1 M (n-C <sub>4</sub> H <sub>9</sub> ) <sub>4</sub> NCIO <sub>4</sub> , with the concentrations of the compounds held at 1 mM; scan rate = 100 mV s <sup>-1</sup> . | S14      |

|                 |                                                                                                                                                                                                                                                                                                                                                                                                |     |
|-----------------|------------------------------------------------------------------------------------------------------------------------------------------------------------------------------------------------------------------------------------------------------------------------------------------------------------------------------------------------------------------------------------------------|-----|
| <b>Fig. S21</b> | Steady-state ((a) & (b) absorption and ((c): $\lambda_{\text{ex}}$ : 275 nm & (d): $\lambda_{\text{ex}}$ : 335 nm) emission spectra of naphthalene ( <b>Naph</b> ) and pyrene in dichloromethane (DCM).                                                                                                                                                                                        | S15 |
| <b>Fig. S22</b> | Overlay of the steady-state emission spectrum of naphthalene ( <b>Naph</b> ) and absorption spectrum of <b>TBAPY</b> .                                                                                                                                                                                                                                                                         | S16 |
| <b>Fig. S23</b> | Emission spectra of equiabsorbing solutions of <b>1</b> , <b>2</b> , <b>3</b> and the control compounds, naphthalene ( <b>Naph</b> ), pyrene, and 1,3, 5, 7-tetratolyl-azaborondipyrromethene ( <b>TBAPY</b> ) in hexanes.                                                                                                                                                                     | S17 |
| <b>Fig. S24</b> | Emission spectra of equiabsorbing solutions of <b>1</b> , <b>2</b> , <b>3</b> and the control compounds, naphthalene ( <b>Naph</b> ), pyrene, and 1,3, 5, 7-tetratolyl-azaborondipyrromethene ( <b>TBAPY</b> ) in hexanes, dichloromethane (DCM), and acetonitrile (ACN) displaying the scattering peaks.                                                                                      | S18 |
| <b>Fig. S25</b> | Energy level diagram showing (a) photo-induced electron transfer in <b>2</b> and (b) photo-induced energy transfer in <b>3</b> in three solvents, hexanes, DCM, and ACN.                                                                                                                                                                                                                       | S19 |
| <b>Fig. S26</b> | Fluorescence decay curves of (a & d) naphthalene ( <b>Naph</b> ), <b>1</b> , and <b>3</b> ( $\lambda_{\text{ex}} = 275$ nm), (b & e) pyrene, <b>1</b> and <b>2</b> ( $\lambda_{\text{ex}} = 335$ nm), and (c & f) 1,3, 5, 7-tetratolyl-azaborondipyrromethene ( <b>TBAPY</b> ), <b>1</b> , <b>2</b> , and <b>3</b> ( $\lambda_{\text{ex}} = 635$ nm) in hexanes and acetonitrile respectively. | S20 |

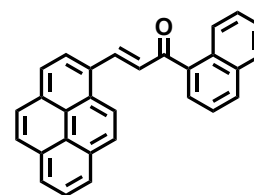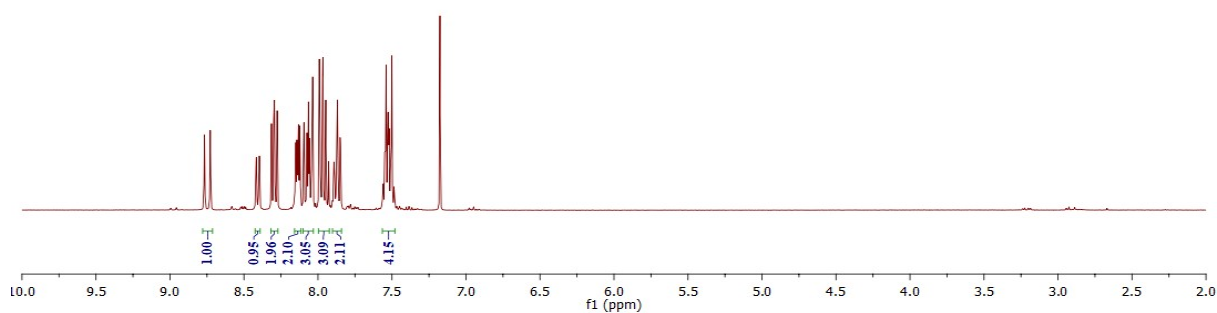

**Fig. S1.**  $^1\text{H}$  NMR spectrum of (*E*)-1-(Naphthalen-1-yl)-3-(pyren-1-yl)prop-2-en-1-one (**1a**) in  $\text{CDCl}_3$ .

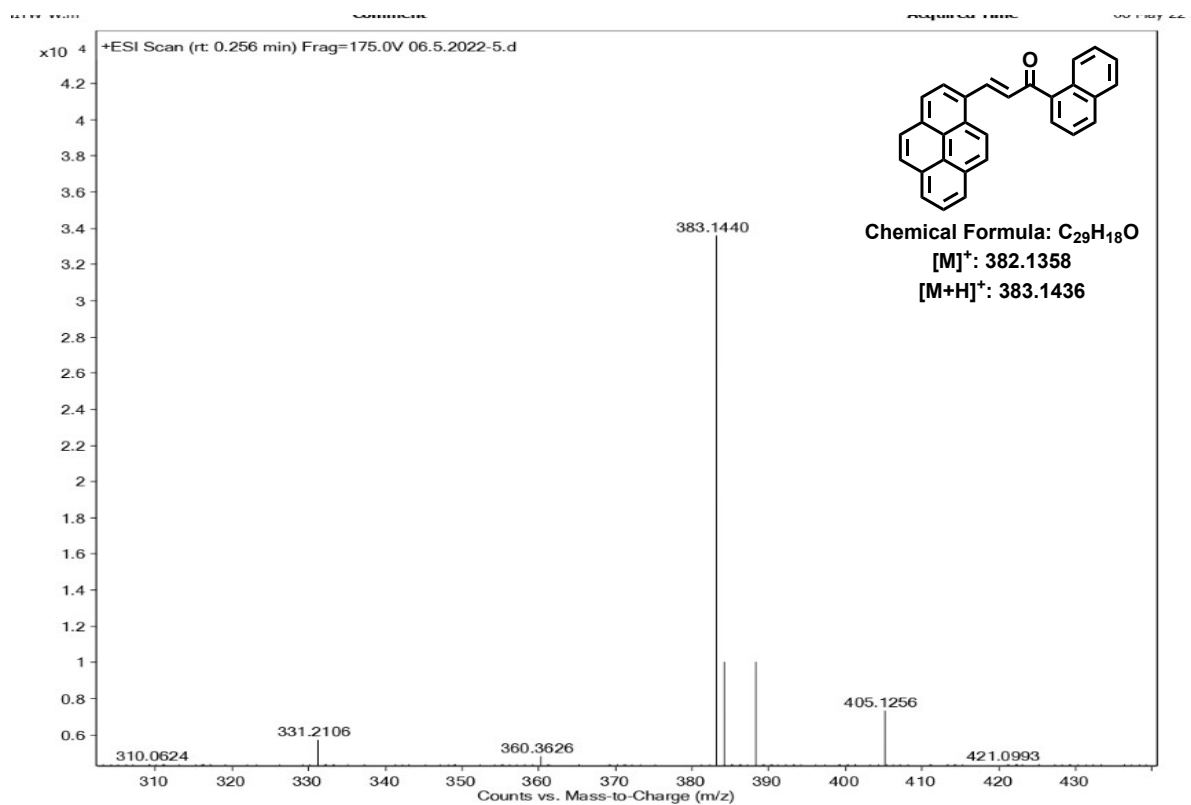

**Fig. S2.** ESI-MS spectrum of (*E*)-1-(Naphthalen-1-yl)-3-(pyren-1-yl)prop-2-en-1-one (**1a**) in methanol.

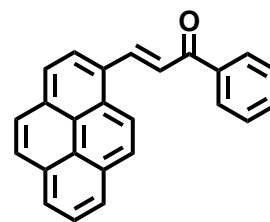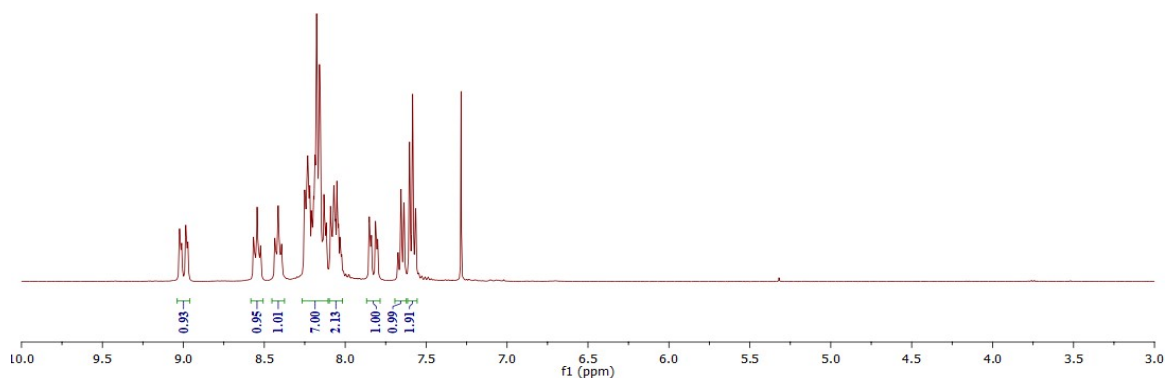

**Fig. S3.**  $^1\text{H}$  NMR spectrum of (*E*)-1-Phenyl-3-(pyren-1-yl)prop-2-en-1-one (**2a**) in  $\text{CDCl}_3$ .

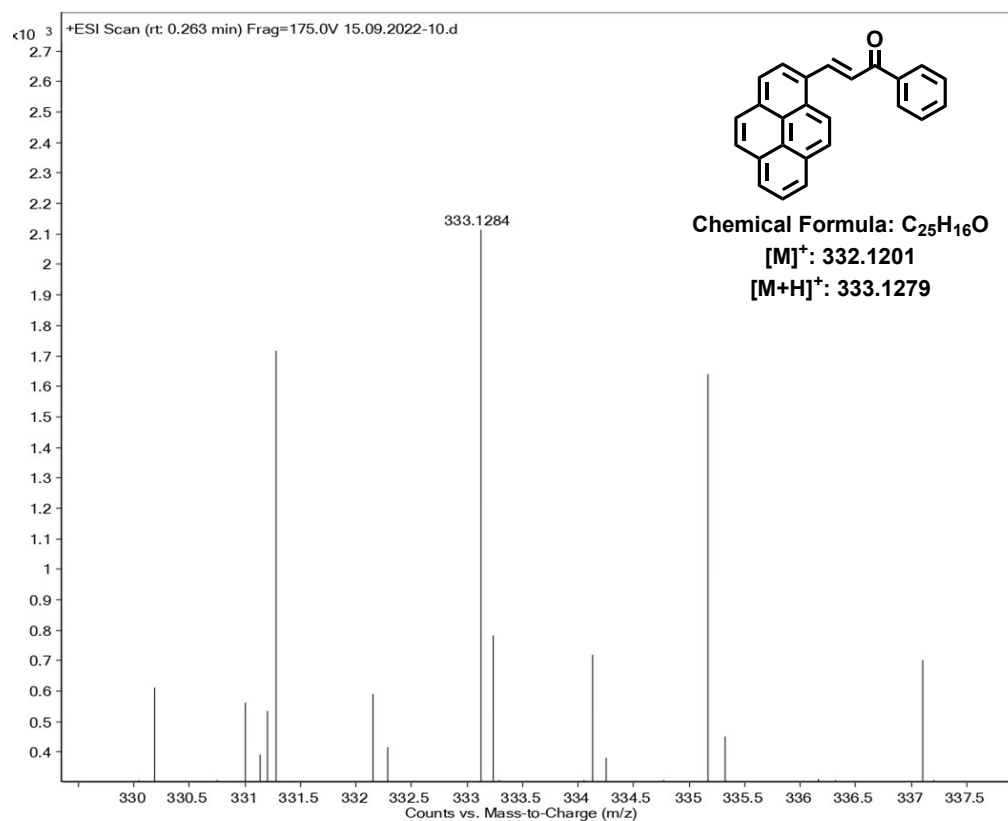

**Fig. S4.** ESI-MS of (*E*)-1-Phenyl-3-(pyren-1-yl)prop-2-en-1-one (**2a**) in methanol.

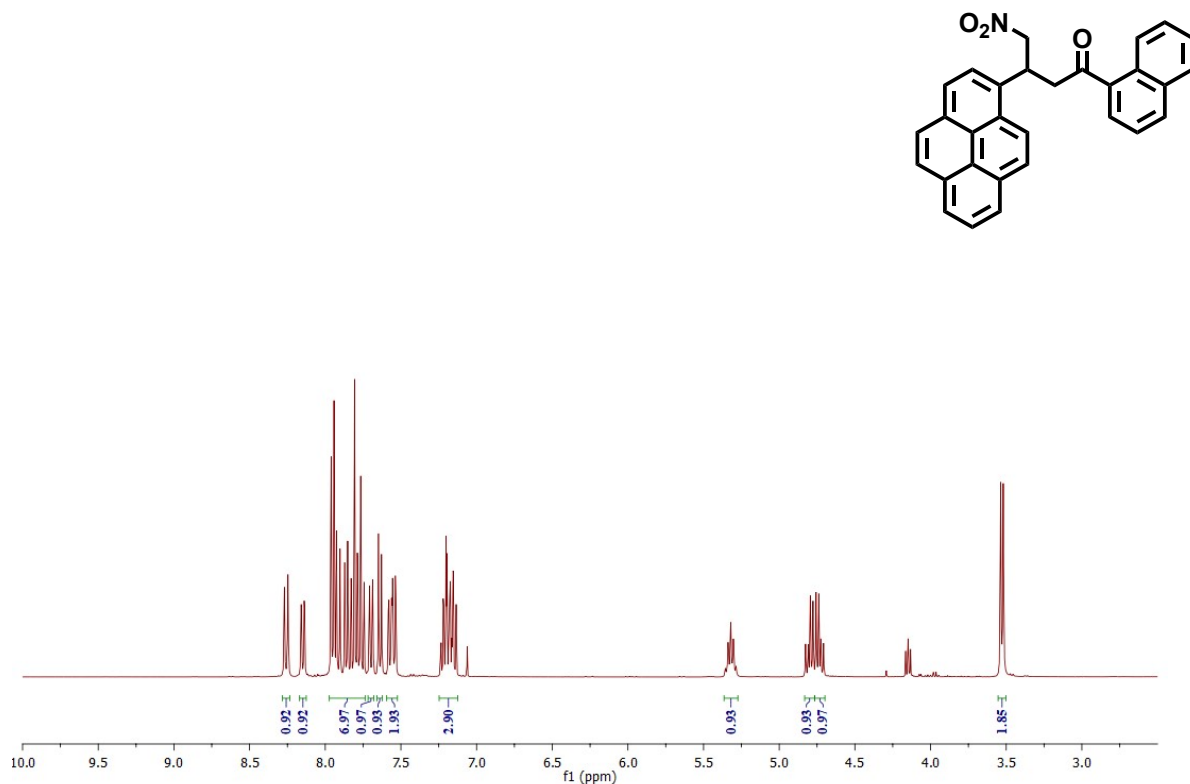

**Fig. S5.**  $^1\text{H}$  NMR spectrum of 1-(Naphthalen-1-yl)-4-nitro-3-(pyren-1-yl)butan-1-one (**1b**) in  $\text{CDCl}_3$ .

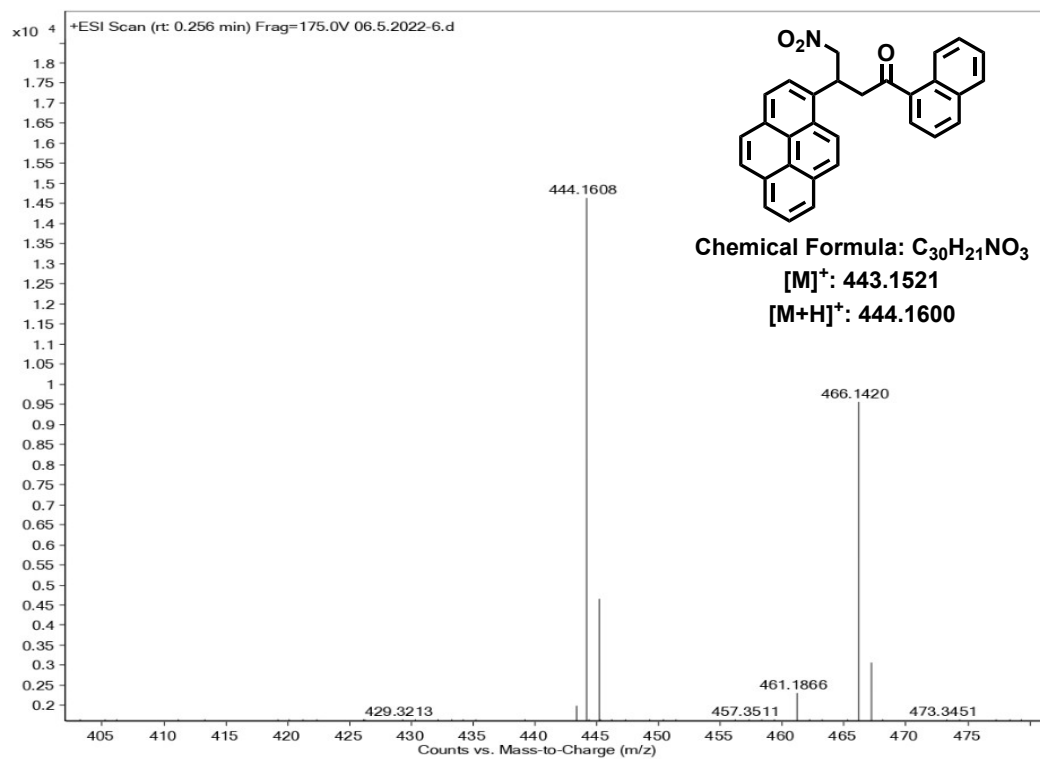

**Fig. S6.** ESI-MS of 1-(Naphthalen-1-yl)-4-nitro-3-(pyren-1-yl)butan-1-one (**1b**) in methanol.

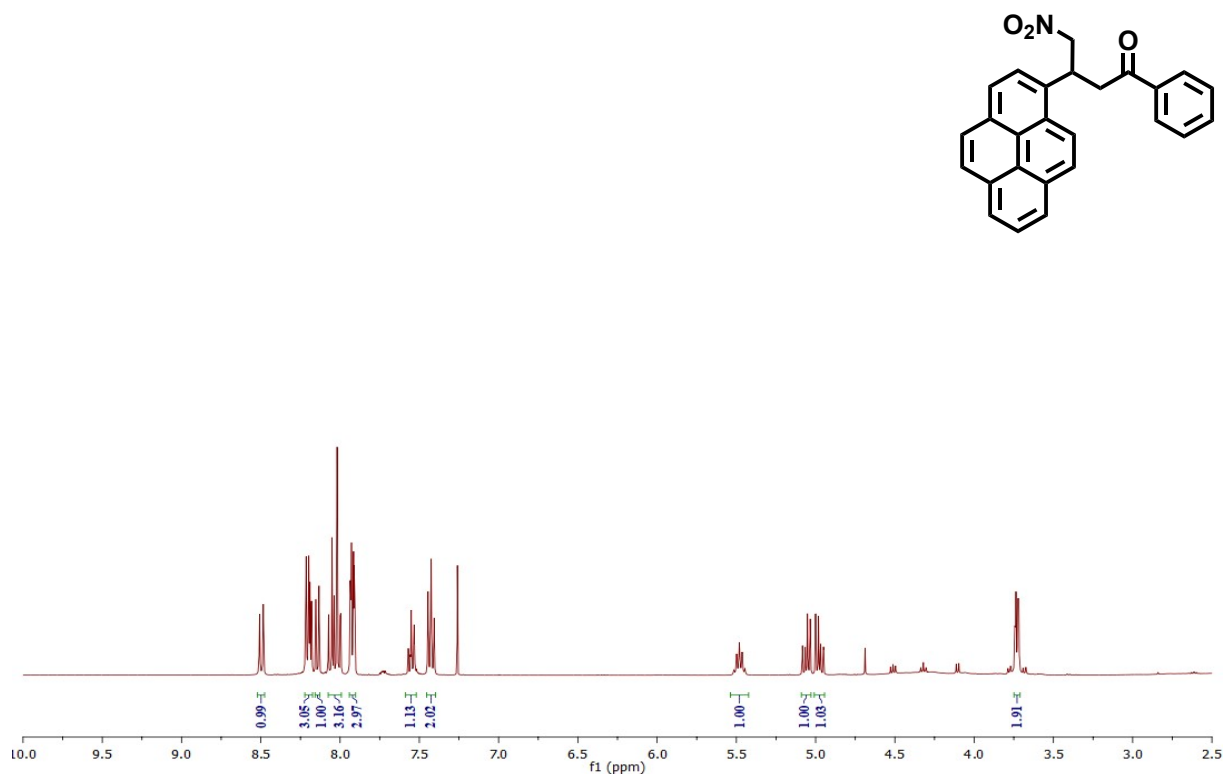

**Fig. S7.** <sup>1</sup>H NMR spectrum of 4-Nitro-1-phenyl-3-(pyren-1-yl)butan-1-one (**2b**) in CDCl<sub>3</sub>.

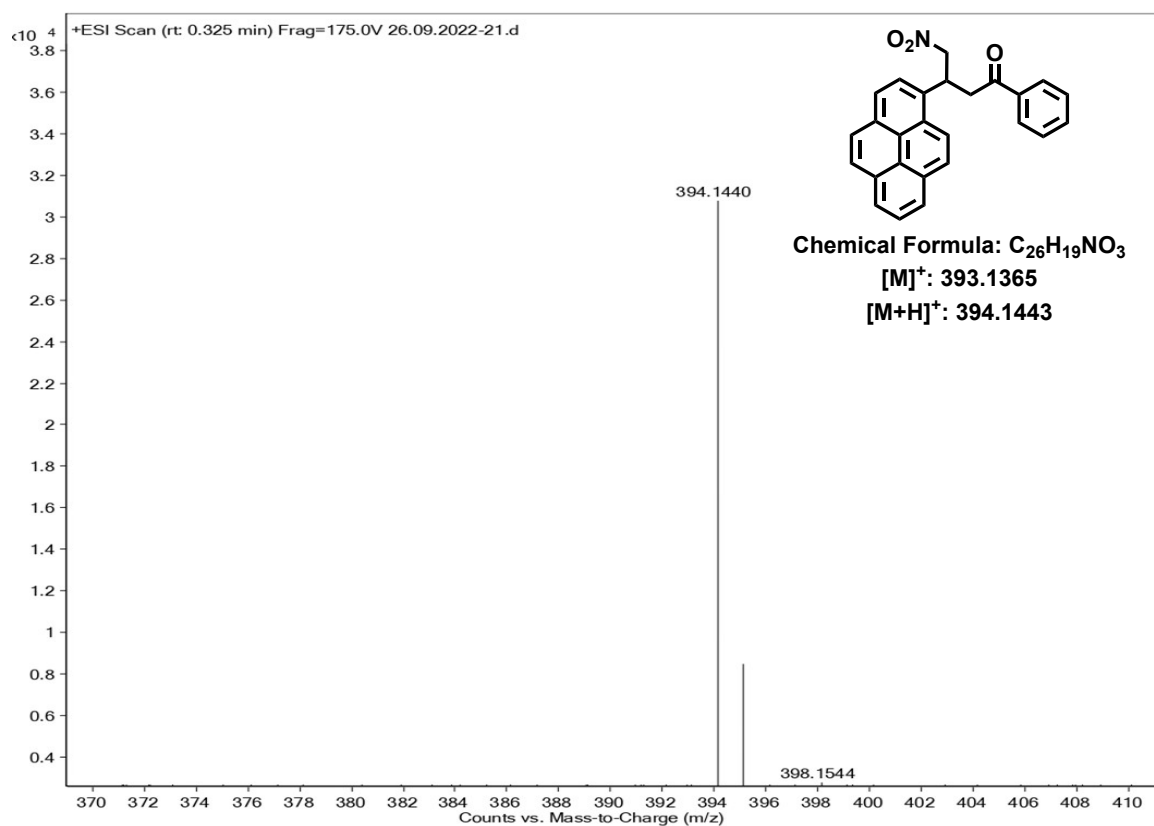

**Fig. S8.** ESI-MS of 4-Nitro-1-phenyl-3-(pyren-1-yl)butan-1-one (**2b**) in methanol.

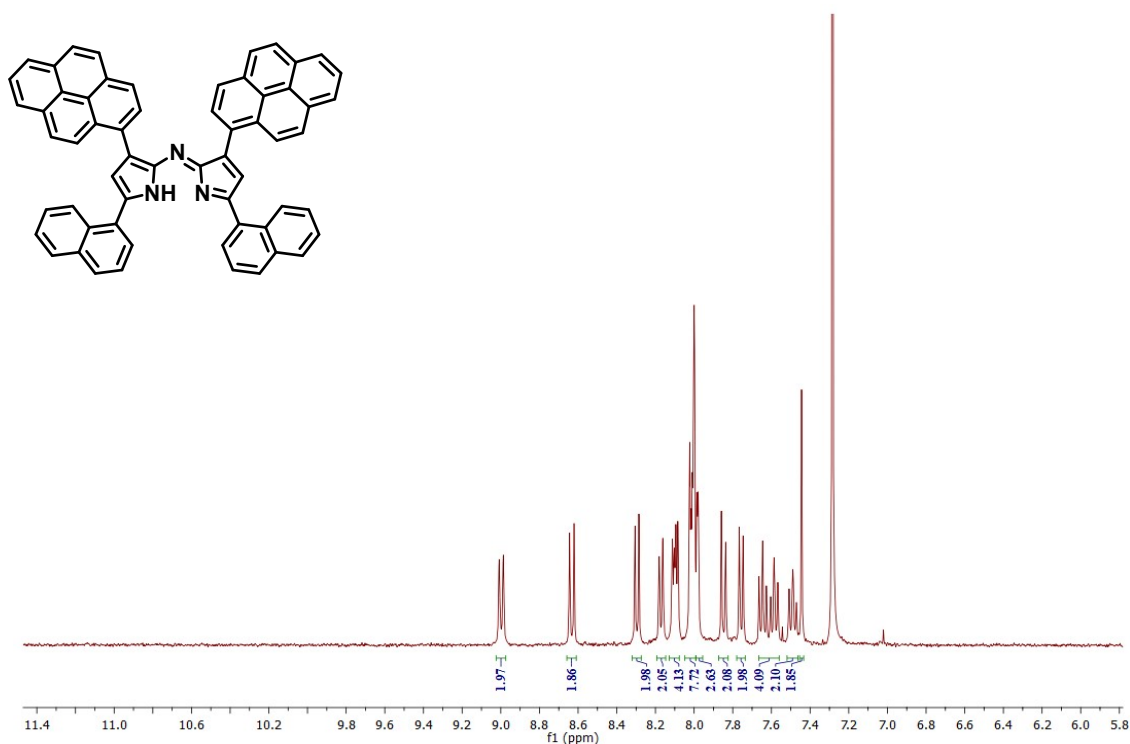

**Fig. S9.**  $^1\text{H}$  NMR spectrum of (Z)-5-(Naphthalen-1-yl)-N-(5-(naphthalen-1-yl)-3-(pyren-1-yl)-1H-pyrrol-2-yl)-3-(pyren-1-yl)-2H-pyrrol-2-imine (**1c**) in  $\text{CDCl}_3$ .

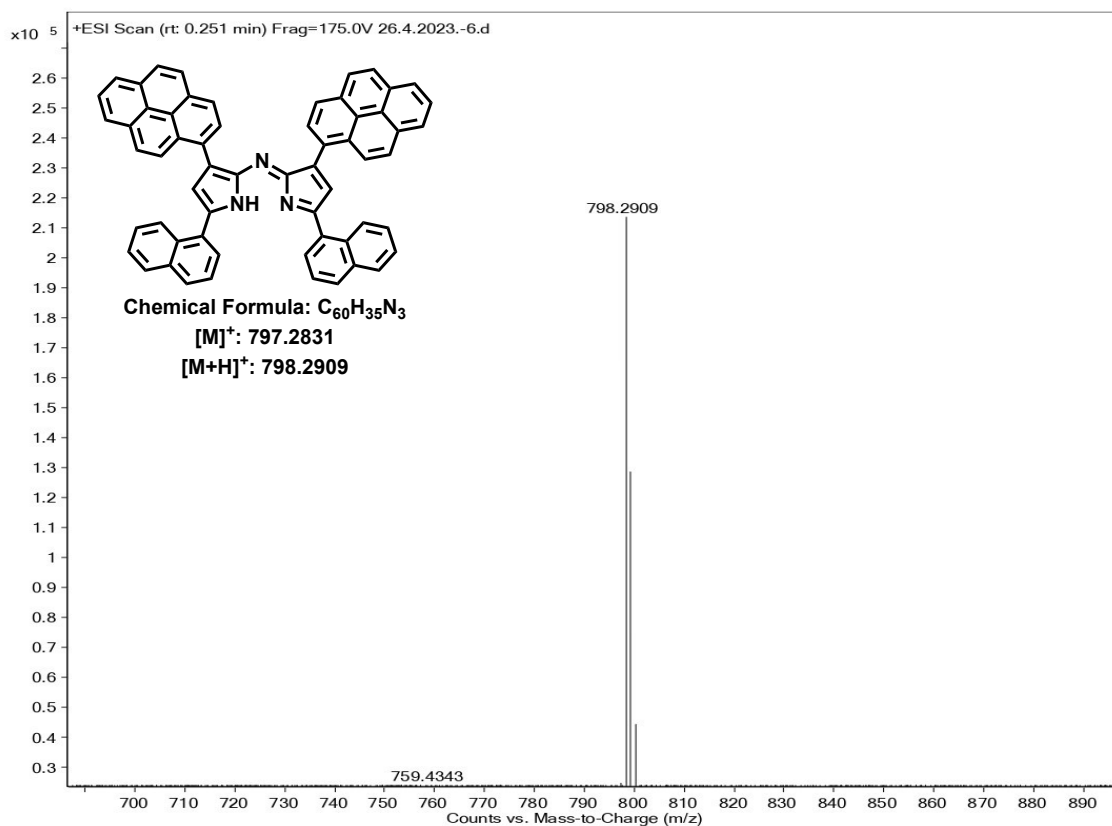

**Fig. S10.** ESI-MS spectrum of (Z)-5-(Naphthalen-1-yl)-N-(5-(naphthalen-1-yl)-3-(pyren-1-yl)-1H-pyrrol-2-yl)-3-(pyren-1-yl)-2H-pyrrol-2-imine (**1c**) in methanol.



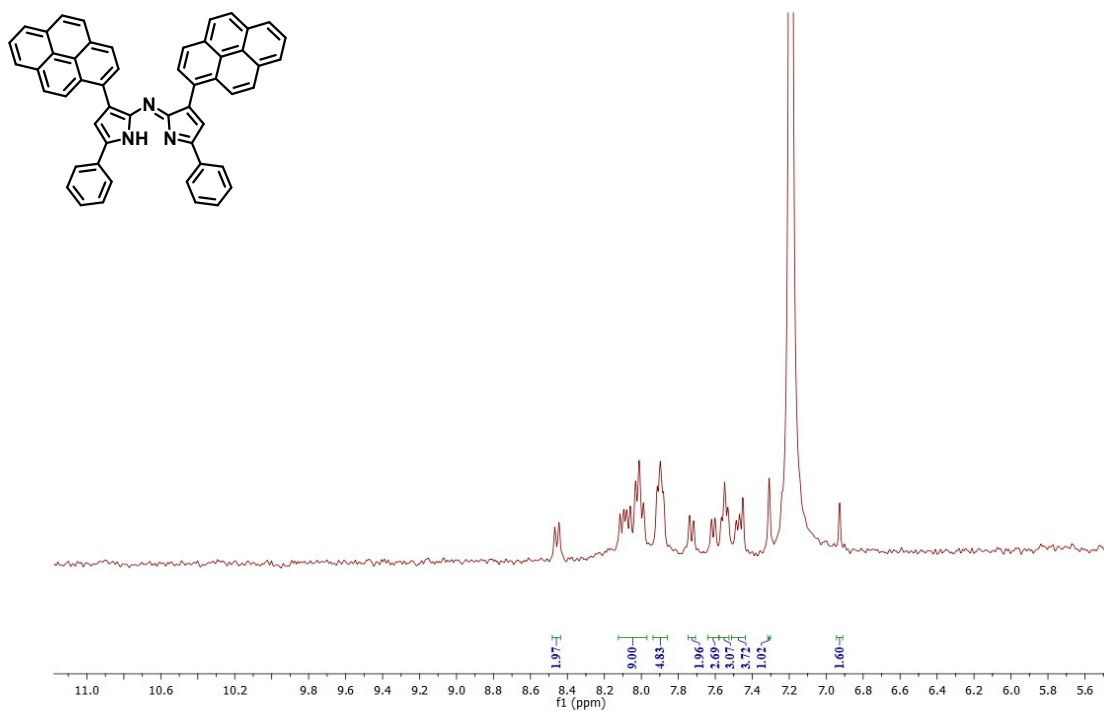

**Fig. S11.**  $^1\text{H}$  NMR spectrum of (Z)-5-Phenyl-N-(5-phenyl-3-(pyren-1-yl)-1H-pyrrol-2-yl)-3-(pyren-1-yl)-2H-pyrrol-2-imine (**2c**) in  $\text{CDCl}_3$ .

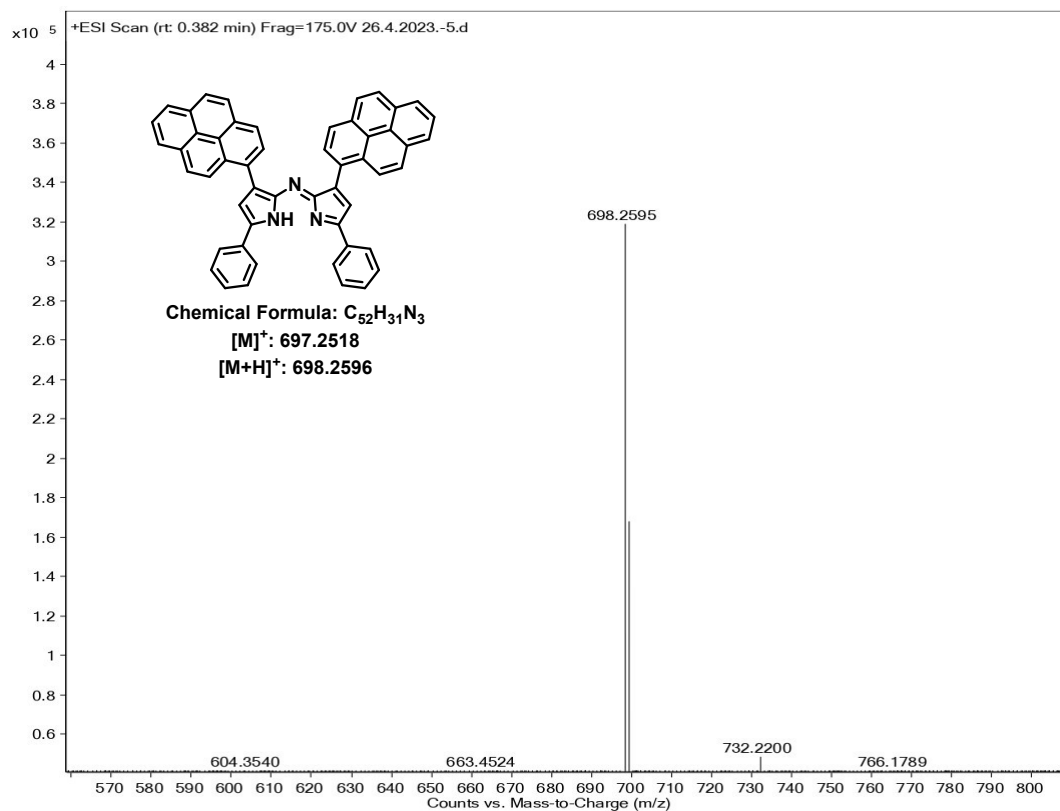

**Fig. S12.** ESI-MS spectrum of (Z)-5-phenyl-N-(5-phenyl-3-(pyren-1-yl)-1H-pyrrol-2-yl)-3-(pyren-1-yl)-2H-pyrrol-2-imine (**2c**) in methanol.

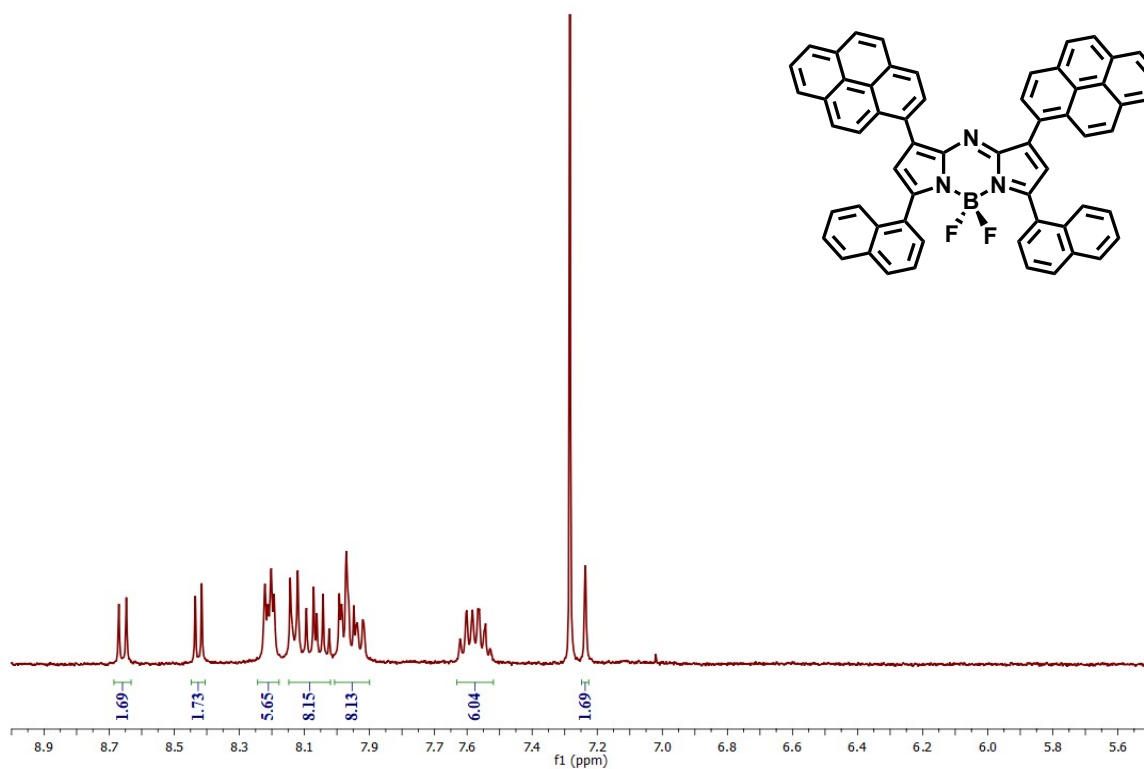

**Fig. S13.**  $^1\text{H}$  NMR spectrum of 4,4-Difluoro-1,7-di-(pyren-1-yl)-3,5-di(1-naphthyl)-4-bora-3a, 4a, 8-triaza-s-indacene (**1**) in  $\text{CDCl}_3$ .

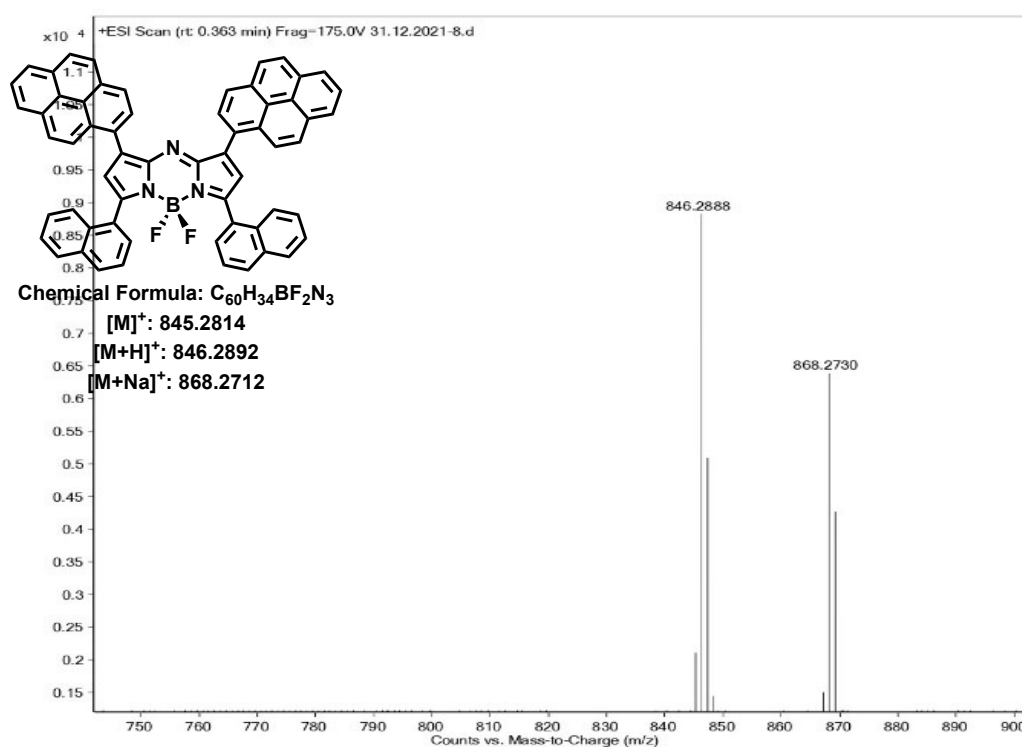

**Fig. S14.** ESI-MS of 4,4-Difluoro-1,7-di (pyren-1-yl)-3,5-di-(1-naphthyl)-4-bora-3a, 4a, 8-triaza-s-indacene (**1**) in methanol.

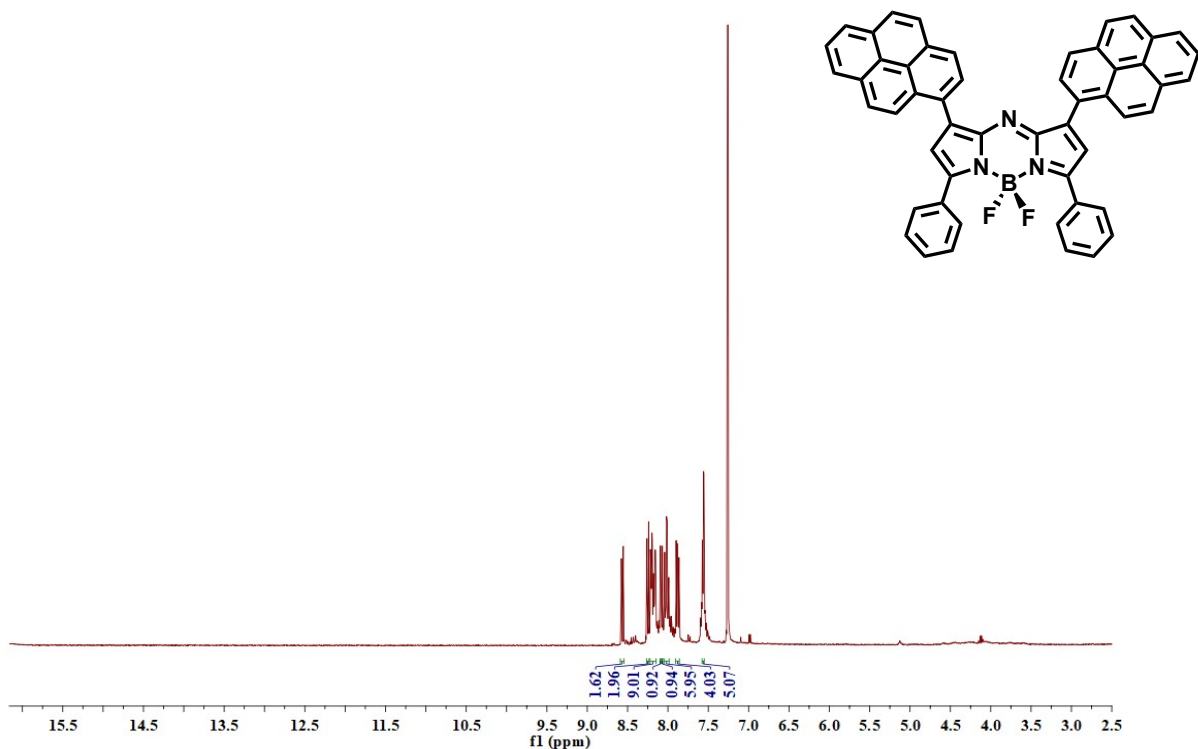

**Fig. S15.** 4,4-Difluoro-1,7-di-(pyren-1-yl)-3,5-di(phenyl)-4-bora-3a, 4a, 8-triaza-s-indacene (**2**) in  $\text{CDCl}_3$ .

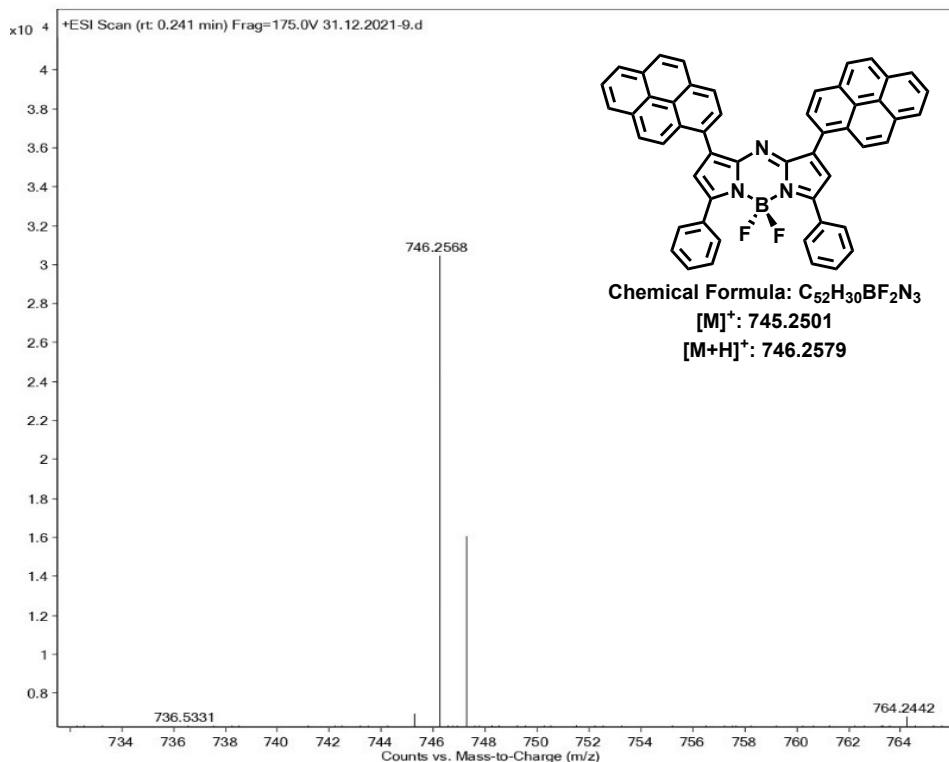

**Fig. S16.** ESI-MS of 4,4-Difluoro-1,7-di-(pyren-1-yl)-3,5-di(phenyl)-4-bora-3a, 4a, 8-triaza-s-indacene (**2**) in methanol.

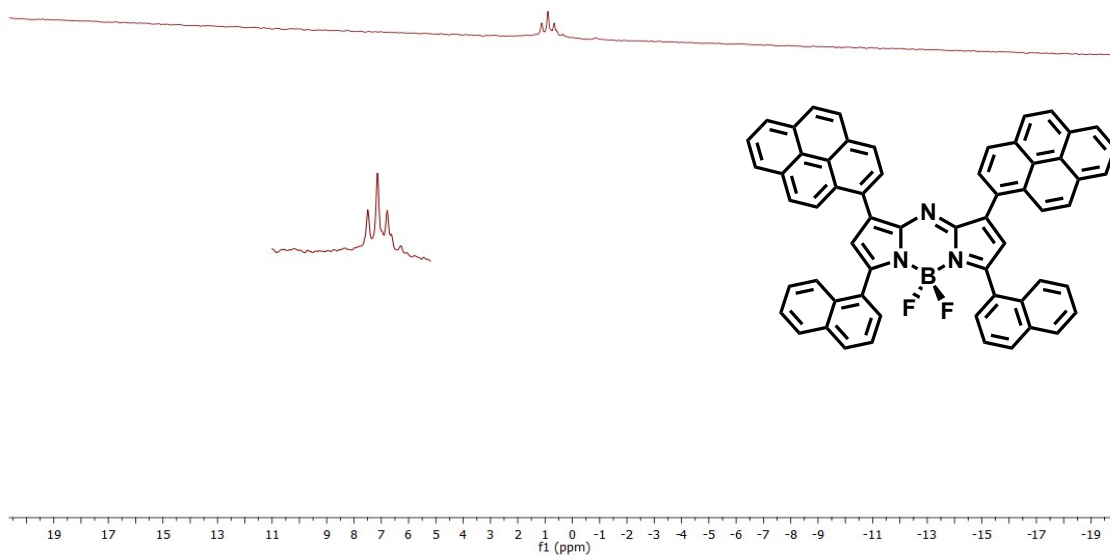

**Fig. S17.**  $^{11}\text{B}$  NMR spectrum of 4,4-Difluoro-1,7-di (pyren-1yl)-3,5-di(1-naphthyl)-4-bora-3a, 4a, 8-triaza-s-indacene (**1**) in  $\text{CDCl}_3$ .

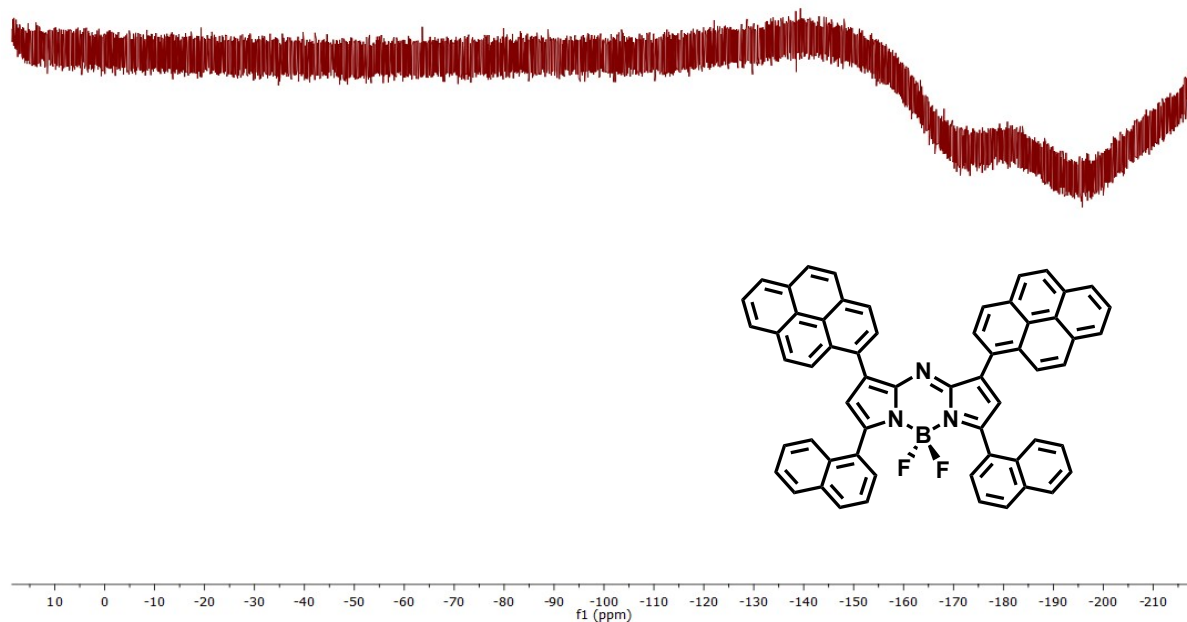

**Fig. S18.**  $^{19}\text{F}$  spectrum of 4,4-Difluoro-1,7-di (pyren-1yl)-3,5-di(1-naphthyl)-4-bora-3a, 4a, 8-triaza-s-indacene (**1**) in  $\text{CDCl}_3$ .

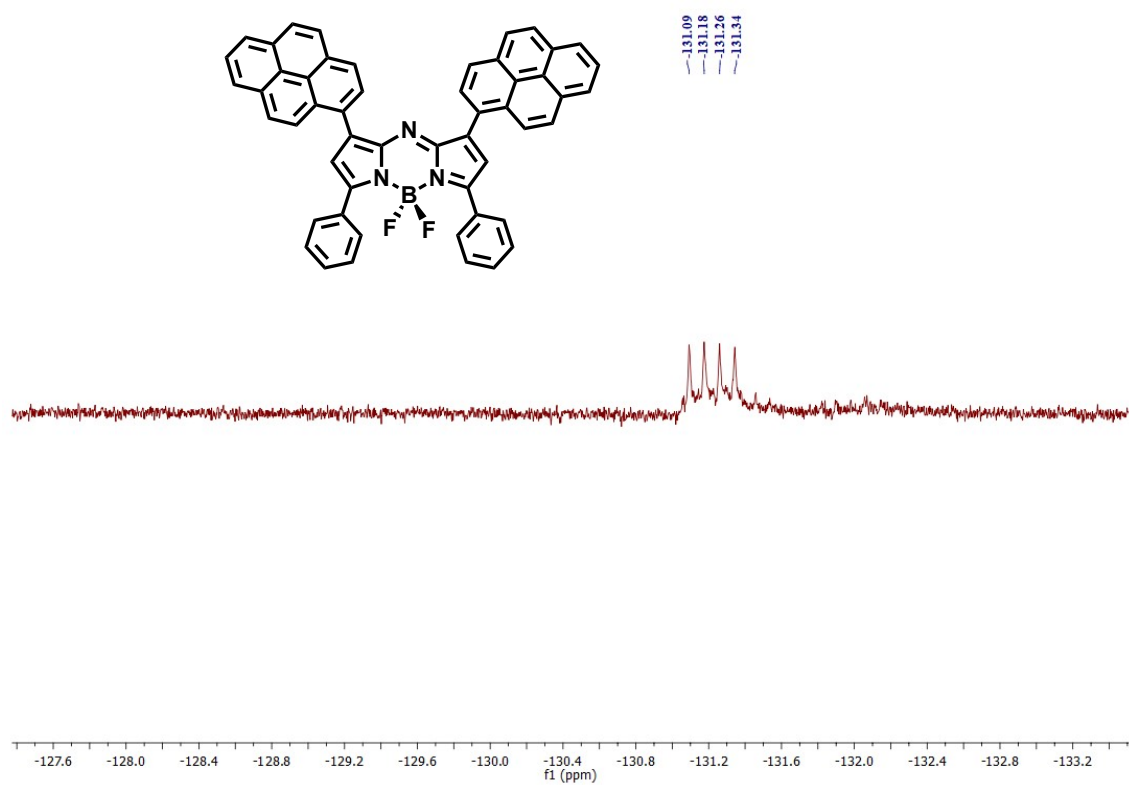

**Fig. S19.**  $^{19}\text{F}$  NMR spectrum of 4,4-Difluoro-1,7-di-(pyren-1-yl)-3,5-di(phenyl)-4-bora-3a,4a,8-triaza-s-indacene (**2**) in  $\text{CDCl}_3$ .

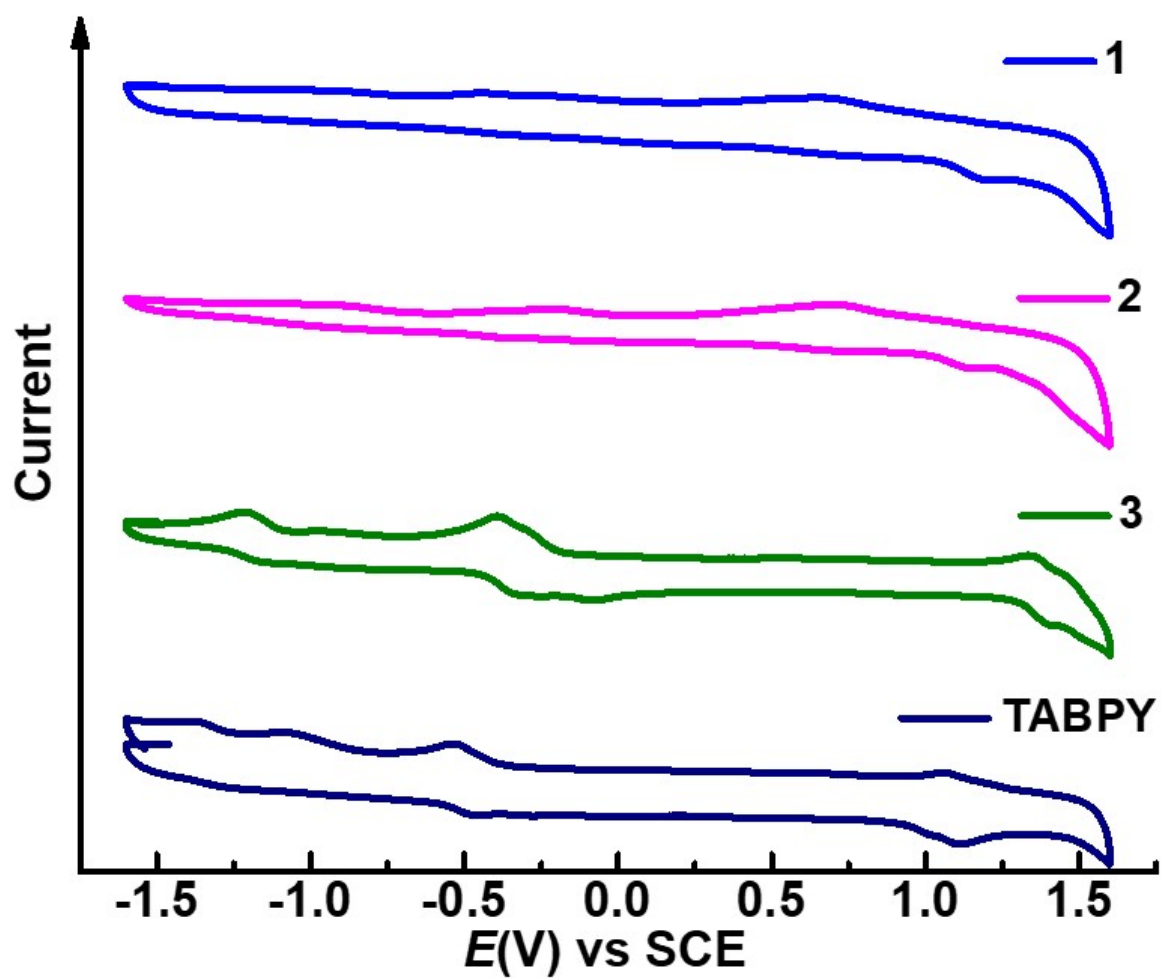

**Fig. S20.** Cyclic voltammetry of **1**, **2**, **3**, and **TABPY** in dichloromethane containing 0.1 M  $(n\text{-C}_4\text{H}_9)_4\text{NClO}_4$ , with the concentrations of the compounds held at 1 mM; scan rate = 20  $\text{mV s}^{-1}$ .

(a)

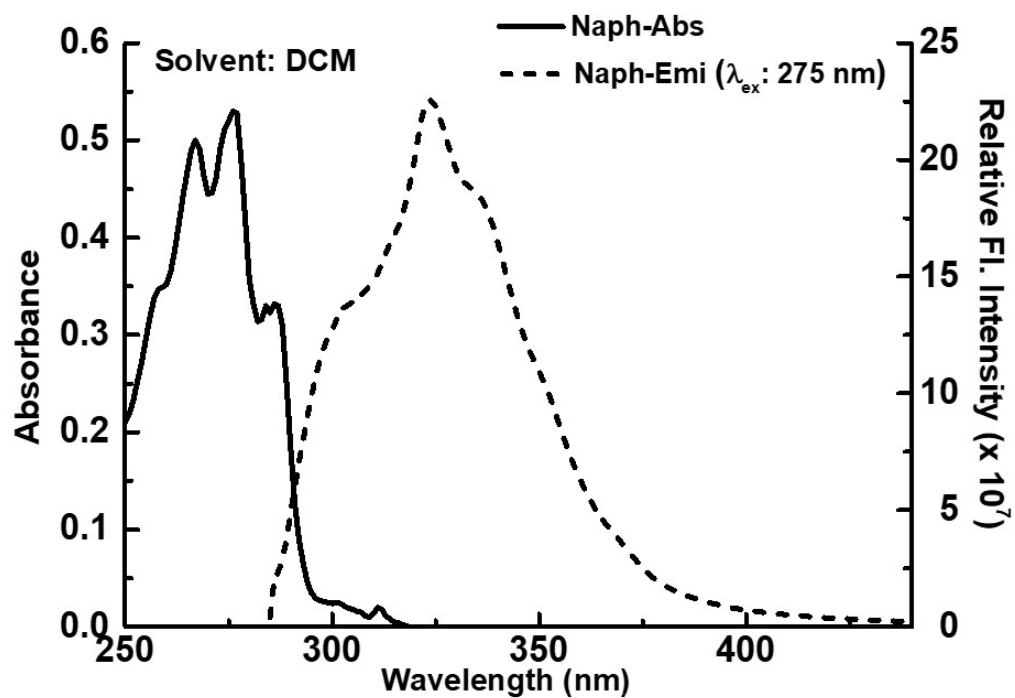

(b)

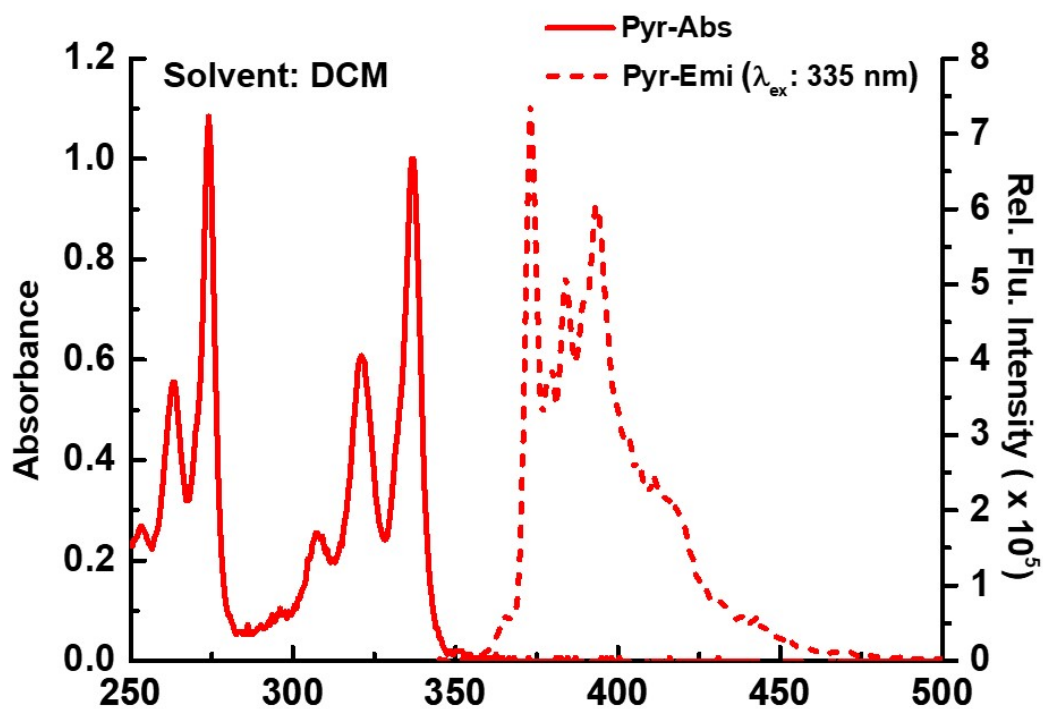

**Fig. S21.** Steady-state ((a) & (b) absorption and ((c): $\lambda_{ex}$ : 275 nm & (d):  $\lambda_{ex}$ : 335 nm) emission spectra of **Naph** and **Pyr** in dichloromethane (DCM).

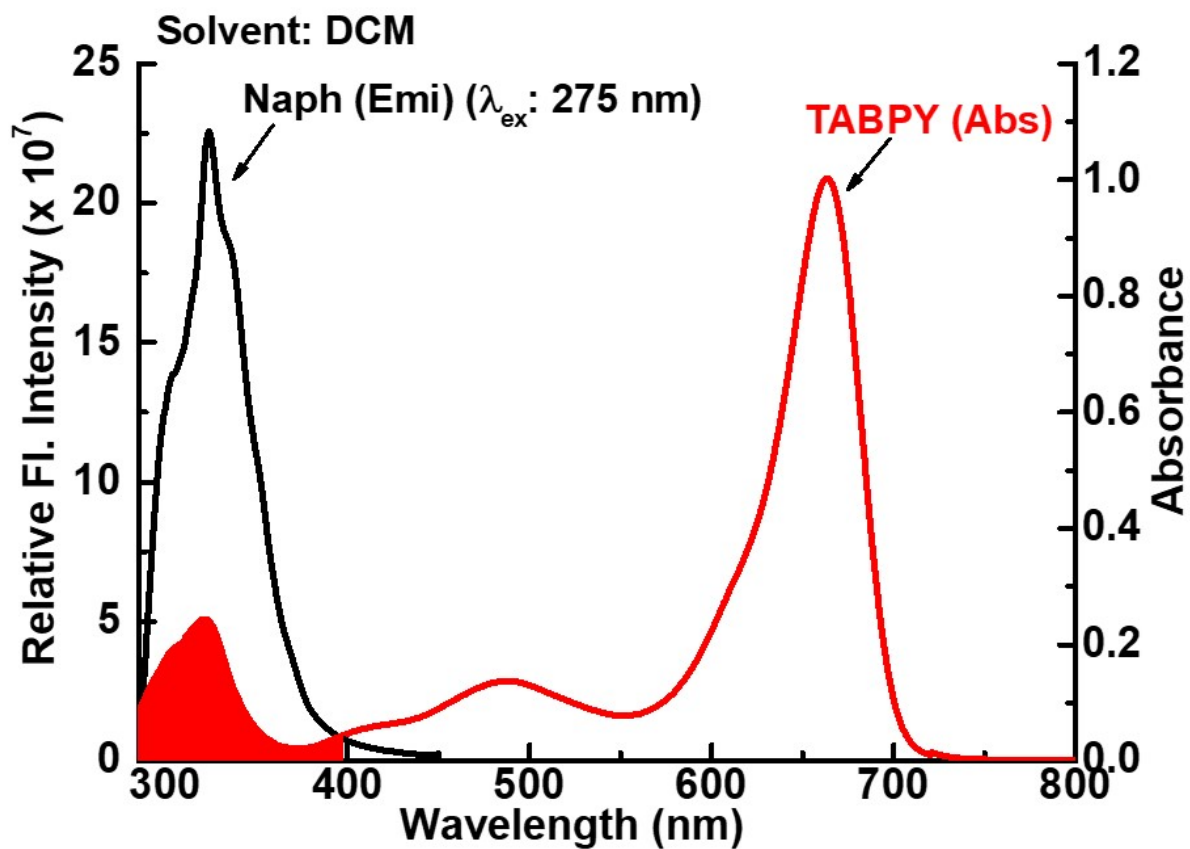

Fig. S22. Overlay of the steady-state emission spectrum of **Naph** and absorption spectrum of **TBAPY**.



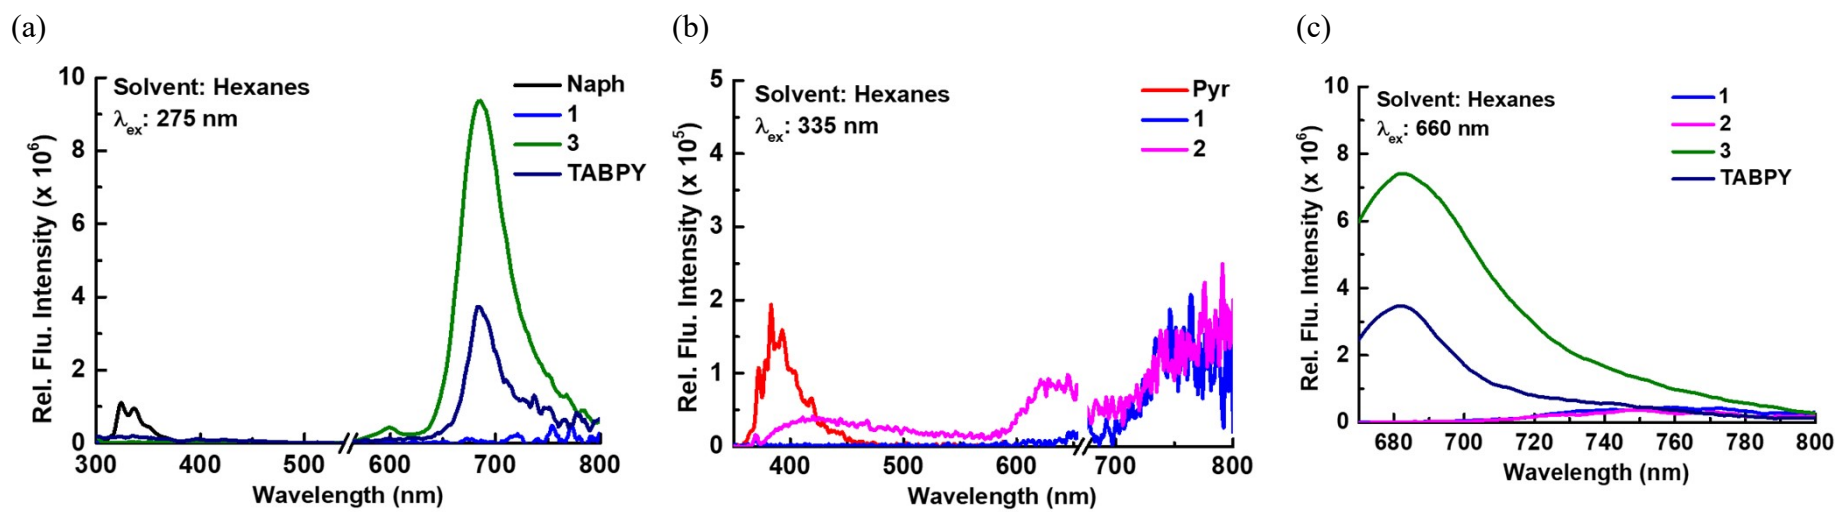

**Fig. S23.** Emission spectra of equiabsorbing solutions of **1**, **2**, **3** and the control compounds, **Naph**, **Pyr**, and **TABPY** in hexanes.

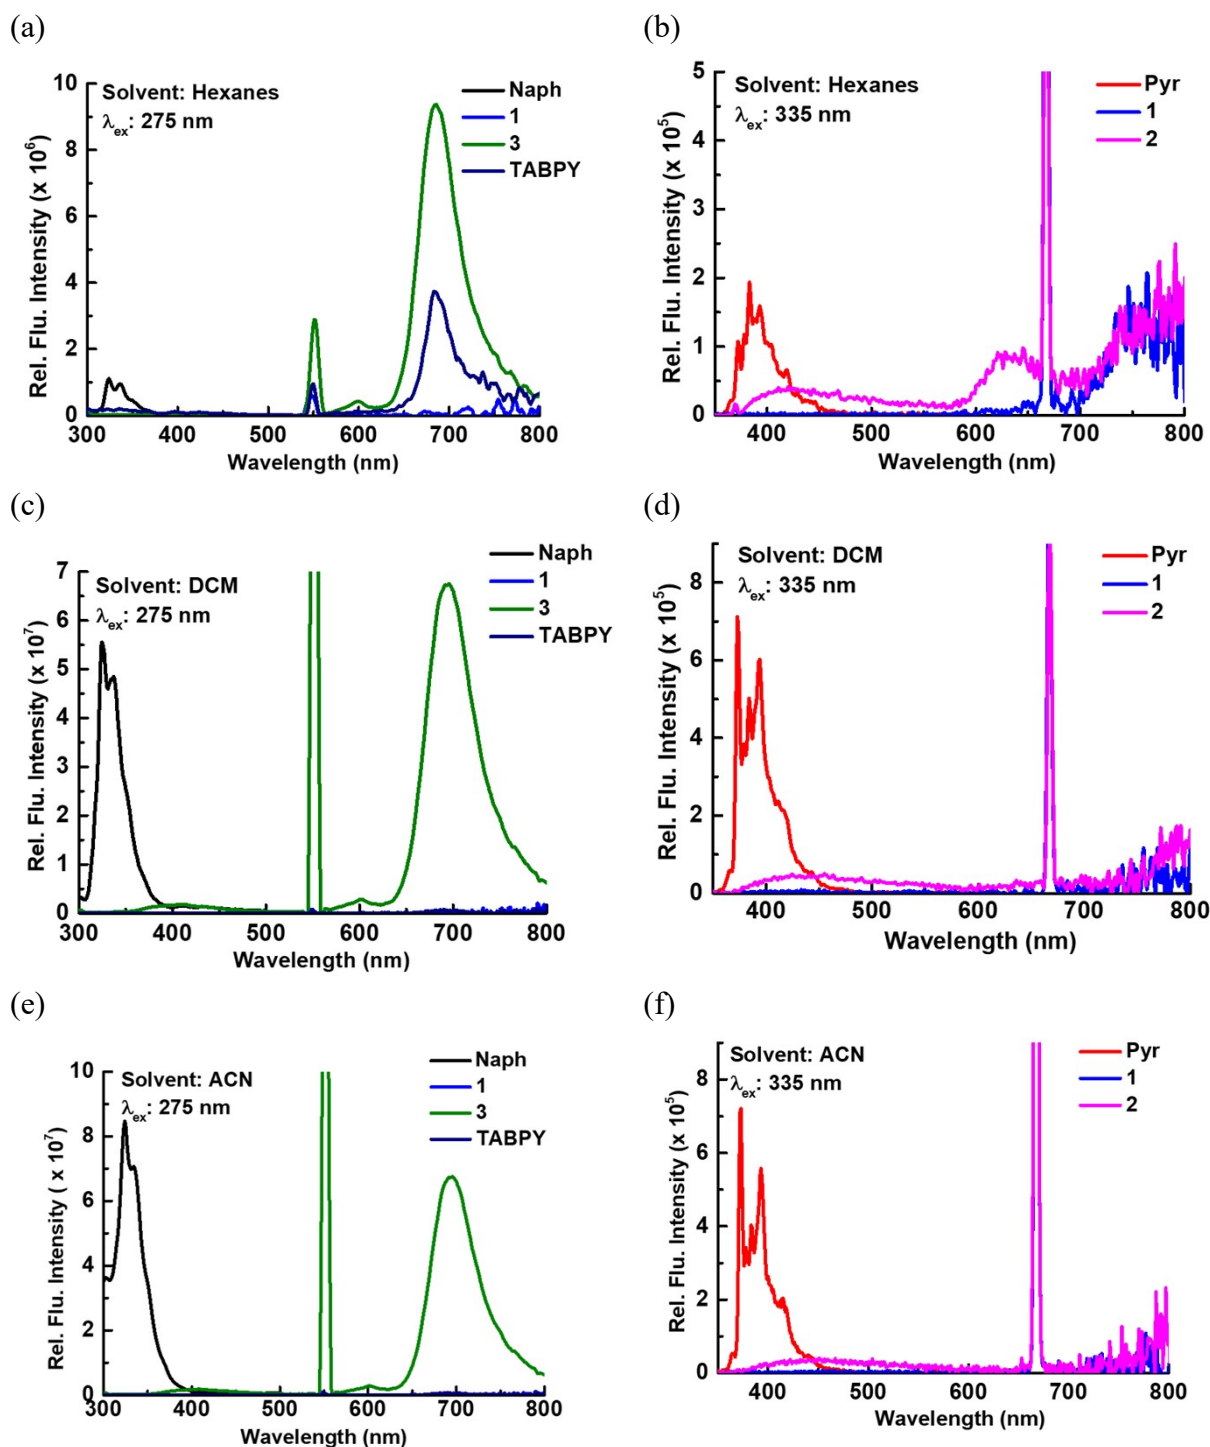

**Fig. S24.** Emission spectra of equiabsorbing solutions of **1**, **2**, **3** and the control compounds, naphthalene (**Naph**), pyrene, and 1,3, 5, 7-tetratolyl-azaborondipyrromethene (**TABPY**) in hexanes, dichloromethane (DCM), and acetonitrile (ACN) displaying the scattering peaks.

(a)

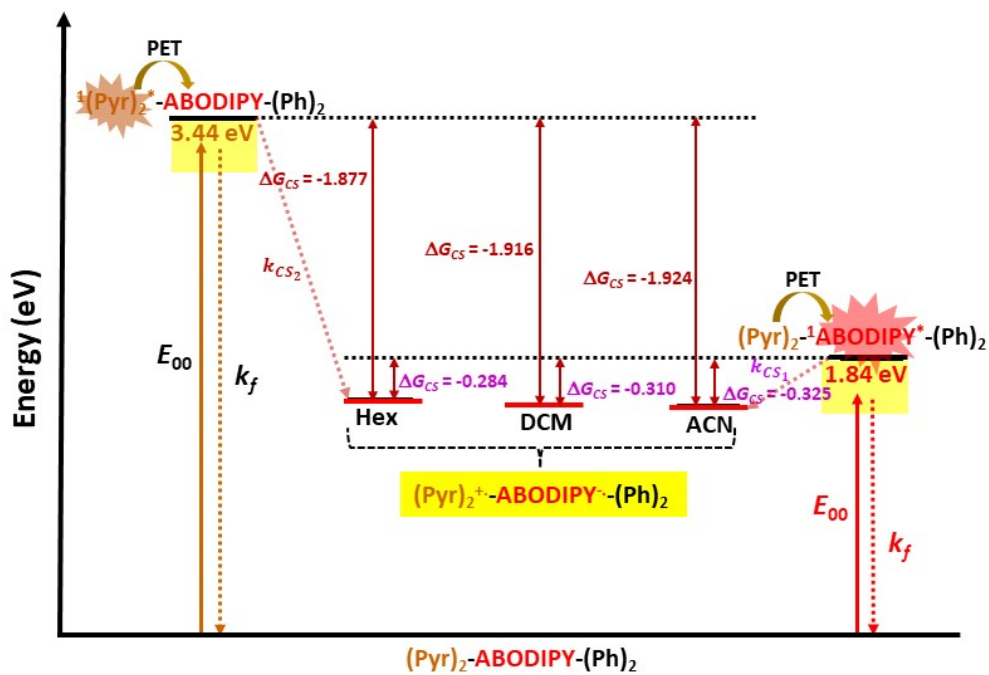

(b)

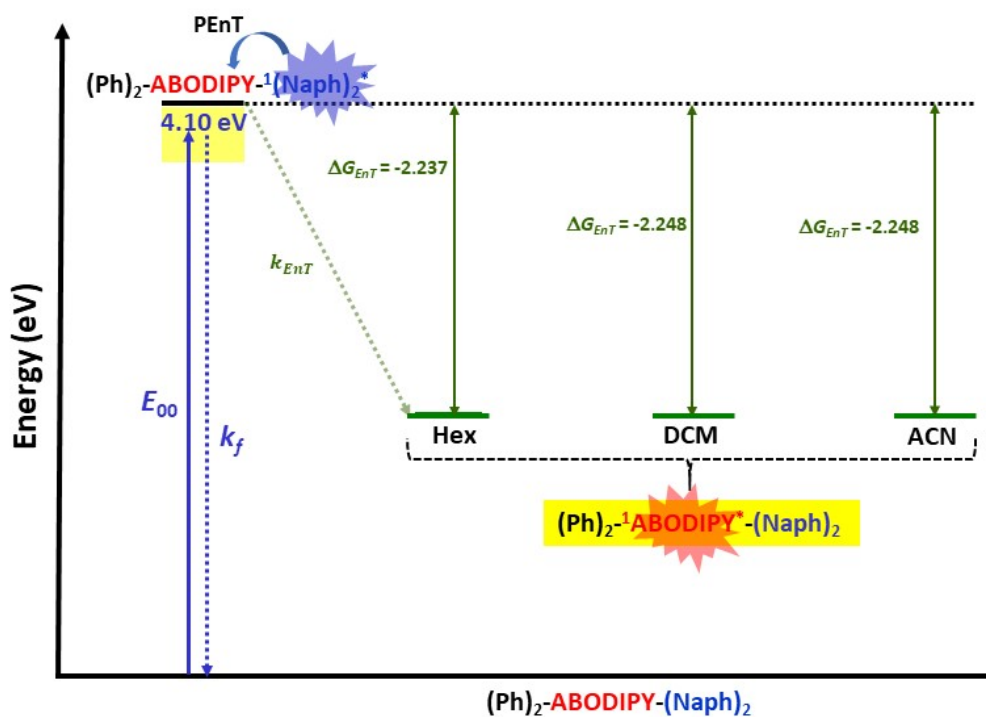

Fig. S25. Energy level diagram showing (a) photo-induced electron transfer in **2** and (b) photo-induced energy transfer in **3** in three solvents, hexanes, DCM, and ACN.

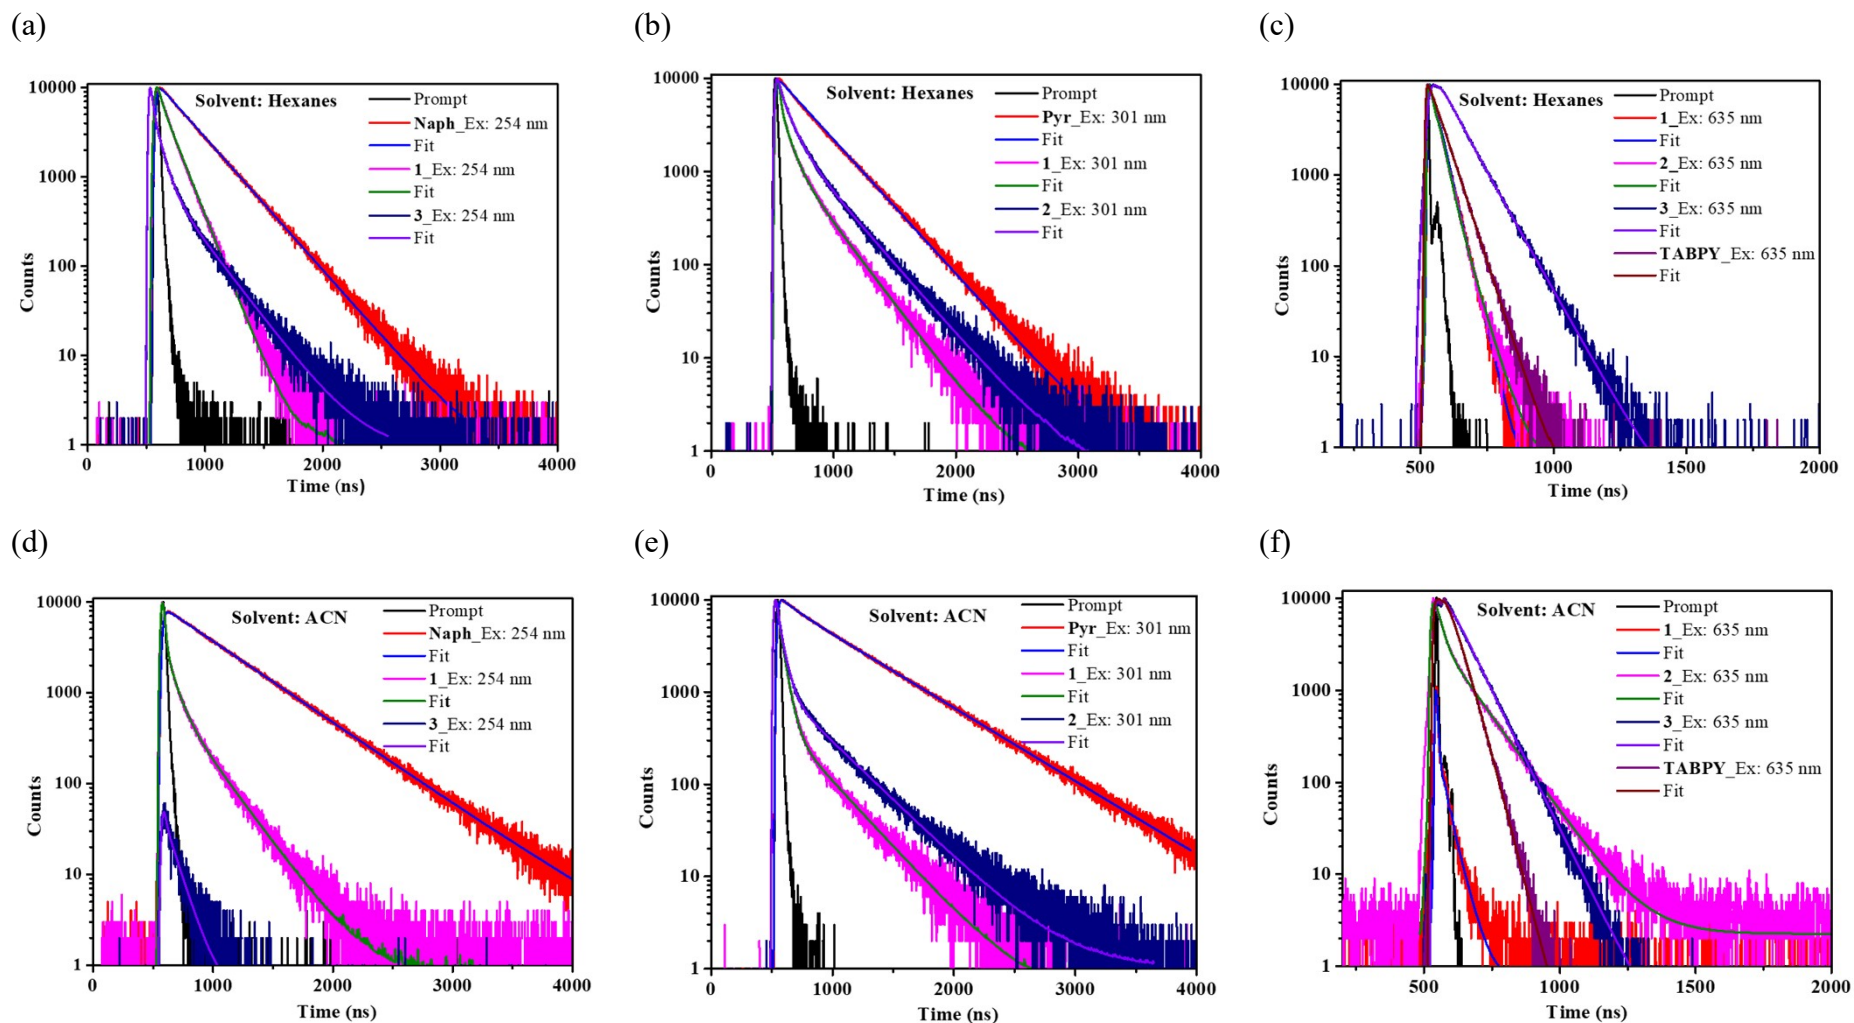

**Fig. S26.** Fluorescence decay curves of (a & d) naphthalene (**Naph**), **1**, and **3** ( $\lambda_{\text{ex}} = 275$  nm), (b & e) pyrene, **1** and **2** ( $\lambda_{\text{ex}} = 335$  nm), and (c & f) 1,3,5,7-tetratolyl-azaborondipyrromethene (**TABPY**), **1**, **2**, and **3** ( $\lambda_{\text{ex}} = 635$  nm) in hexanes and ACN respectively.
